# Supplementary material for: Implementing electronic patient record systems (EPRs) into England’s acute, mental health and community care trusts: a mixed methods study
Source: Springer Nature journal article supplement (doi:10.1186/s12911-015-0204-0), 2015-10-14
Supplement: MOESM2 [file 9756398]

**Additional file 2 Solution strategies adopted by survey participants**

| Solution Strategy | Description                                                                                                                                                                                                                                                                                                                                                                                                                                                                                                         | Frequency (%) |
|-------------------|---------------------------------------------------------------------------------------------------------------------------------------------------------------------------------------------------------------------------------------------------------------------------------------------------------------------------------------------------------------------------------------------------------------------------------------------------------------------------------------------------------------------|---------------|
| Best of Breed     | <p>Multiple and different departmental systems are typically implemented gradually and incrementally. Individual modules or departmental systems (i.e. clinical decision support, e-prescribing) are chosen based on the needs of the clinical specialty with the replacement of one module not affecting or disrupting other specialties</p> <p>Interoperability is therefore a large factor and refers to making the different systems work together, this is usually achieved through an integration engine.</p> | 19 (32)       |
| Megasuite         | <p>A term used to describe the EPR systems provided by suppliers such as Cerner (Millennium) or Meditech (EPIC). These systems normally contain the full range of clinical and non-clinical EPR functionality that a hospital requires in the form of a single integrated solution rather than via a suite of separate systems interfaced to each other via an integration engine as in a best of breed approach.</p>                                                                                               | 10 (16)       |
| Write it yourself | <p>Providers or trusts that choose to build their own EPR solution rather than procuring one from a commercial supplier. The provider may source the development capacity in-house or contract it out to an external development resource. For example, trusts who have a team of programmers supporting in-house EPR.</p>                                                                                                                                                                                          | 3 (5)         |
| In Development    | <p>Participants who indicated that their solution strategy was in development or undecided.</p>                                                                                                                                                                                                                                                                                                                                                                                                                     | 4 (6)         |
| Combined approach | <p>Best of Breed and write it yourself (n=3)</p> <p>Best of breed and clinical EPR with separate interfaced PAS (n=3)</p> <p>Best of breed and someone else to write it (n=2)</p> <p>Best of breed, clinical EPR separate interfaced PAS someone else to write it,</p>                                                                                                                                                                                                                                              | 17 (28)       |

|       |                                                                                                                                                                                                                                                                                                                                                                                                                                                                                                                                                                                                                              |       |
|-------|------------------------------------------------------------------------------------------------------------------------------------------------------------------------------------------------------------------------------------------------------------------------------------------------------------------------------------------------------------------------------------------------------------------------------------------------------------------------------------------------------------------------------------------------------------------------------------------------------------------------------|-------|
|       | <p>write it yourself (n=1)</p> <p>Best of breed, write it yourself, clinical EPR with separate interfaced PAS (n=1)</p> <p>Best of breed write it yourself, someone else to write it (n=1)</p> <p>Best of breed and own developments (n=1)</p> <p>Best of breed someone else to write it and clinical EPR with separate interfaced PAS (n=1)</p> <p>Primary system, some best of breed some procured some own developments (n=1)</p> <p>Someone else to write it and clinical EPR with separate interfaced PAS (n=1)</p> <p>Write it yourself and other unspecified solutions (n=1)</p> <p>Unspecified combination (n=1)</p> |       |
| Other | An integrated EPR and Integrated system with community                                                                                                                                                                                                                                                                                                                                                                                                                                                                                                                                                                       | 2 (3) |
