# Supplementary material for: Implementing electronic patient record systems (EPRs) into England’s acute, mental health and community care trusts: a mixed methods study
Source: Springer Nature journal article supplement (doi:10.1186/s12911-015-0204-0), 2015-10-14
Supplement: MOESM4 [file 9756398]

**Additional file 4 Demographic characteristics of survey and interview respondents**

|                                                          | Frequency          |                          |
|----------------------------------------------------------|--------------------|--------------------------|
|                                                          | Survey Respondents | Interviewees Respondents |
|                                                          | N (%)              | N                        |
| <b>EPR Status</b>                                        |                    |                          |
| <b>Yes</b>                                               | 47 (79.7)          | 6                        |
| <b>No</b>                                                | 12 (20.3)          | 2                        |
| <b>Trust Type</b>                                        |                    |                          |
| Foundation Trust                                         | 26 (44.1)          | 3                        |
| Non Foundation Acute Trust                               | 13 (22)            | 5                        |
| Mental Health/Community Care Trust                       | 11 (18.6)          | 0                        |
| Combined                                                 | 9 (15.2)           | 0                        |
| <b>Trust Location</b>                                    |                    |                          |
| North England                                            | 16 (27.1)          | 4                        |
| East England and the Midlands                            | 3 (5.1)            | 1                        |
| London and South England                                 | 15 (25.4)          | 3                        |
| Unspecified Location                                     | 25 (42.3)          | -                        |
| <b>Job Title</b>                                         |                    |                          |
| Clinical Information Officer and clinical safety officer | -                  | 1                        |
| Director/associate director of IT                        | -                  | 2                        |
| Director of IM&T and deputy director of IM&T             | -                  | 2                        |
| Director of PAS system                                   | -                  | 1                        |
| Director of Informatics                                  | -                  | 1                        |
| Program Director                                         | -                  | 1                        |
