# Supplementary material for: Implementing electronic patient record systems (EPRs) into England’s acute, mental health and community care trusts: a mixed methods study
Source: Springer Nature journal article supplement (doi:10.1186/s12911-015-0204-0), 2015-10-14
Supplement: MOESM5 [file 9756398]

**Additional file 5 The EPR systems being implemented by trusts in the sample**

| <b>Type of system</b>                   | <b>Frequency</b>    | <b>Description</b>                                                                                                                                                                                                                                                      |
|-----------------------------------------|---------------------|-------------------------------------------------------------------------------------------------------------------------------------------------------------------------------------------------------------------------------------------------------------------------|
| Best of Breed                           | 9                   | See table 2                                                                                                                                                                                                                                                             |
| In House Developments                   | 9                   | See table 2                                                                                                                                                                                                                                                             |
| RiO (RiO mental health)                 | 6                   | An EPR software solution for recording and documenting health care services. Predominately used in mental health and community health settings (22).                                                                                                                    |
| Sunquest ICE                            | 5                   | An integrated clinical environment providing a range of products mainly associated with results and reporting. Other features include; discharge, wristband and label printing (23).                                                                                    |
| Systm One (Systm One community)         | 4                   | Comprises a range of modules (hospital, GP, child health) used together or in isolation. The 'hospital module' includes; PAS, bed management, e-prescribing, e-discharge, A&E and clinical record viewer. (24)                                                          |
| KAINOS Evolve                           | 4                   | An EPR enabling the creation, capture and handling of medical records. Extra features include; e-discharge, patient manager (planning and monitoring clinical activity), timeline (an at a glance patient history) and living forms (to monitor patient progress) (25). |
| Civica Paris                            | 4 (2 Civica Windip) | EPR and care management system for monitoring and managing community and social care. WinDip is an electronic workflow and document management system complementary to the EPR (26)                                                                                     |
| Ascribe                                 | 3                   | A range of solutions which include PAS, order communications, e-prescribing, scheduling, e-handover (27).                                                                                                                                                               |
| Systm C (Medway, Careplus, Liquidlogic) | 3                   | A range of solutions to health and social care such as: Medway EPR, Medway Maternity, Careplus (child health records solution) Liquidlogic (child or adult social care system) (28).                                                                                    |
| IPM                                     | 3                   | Integrated patient management solution which allows the whole patient journey to be tracked within a single system (29).                                                                                                                                                |
| Millenium                               | 2                   | An EPR allowing real time access to patient results and clinical information. Features include; handover, real time dashboards, real time bed management, prescribing, clinical decision support (30).                                                                  |
| Graphnet                                | 2                   | Can be used as either a shared record viewer across organisations or a single EPR in an acute trust. Provides immediate access to up-to-date patient information, assessments, data collection, workflow and notifications across organisations (31).                   |
| PACS                                    | 2                   | A system enabling images such as X-rays to be stored electronically and viewed on screens so information can be accessed and compared to previous images (32).                                                                                                          |
| Meditech                                | 2                   | An EHR comprising a suite of integrated applications including EPR and PAS which include components such as; order communications, A&E management, theatre management, document management and                                                                          |

|             |   |                        |
|-------------|---|------------------------|
|             |   | results reporting (33) |
| No response | 7 |                        |
